# Supplementary material for: Notch1 and Notch4 core binding domain peptibodies exhibit distinct ligand-binding and anti-angiogenic properties
Source: Springer Nature journal article supplement (doi:10.1007/s10456-022-09861-6), 2022-11-15
Supplement: MOESM1 [file 23714116]

**A****Human Notch core binding domain alignment**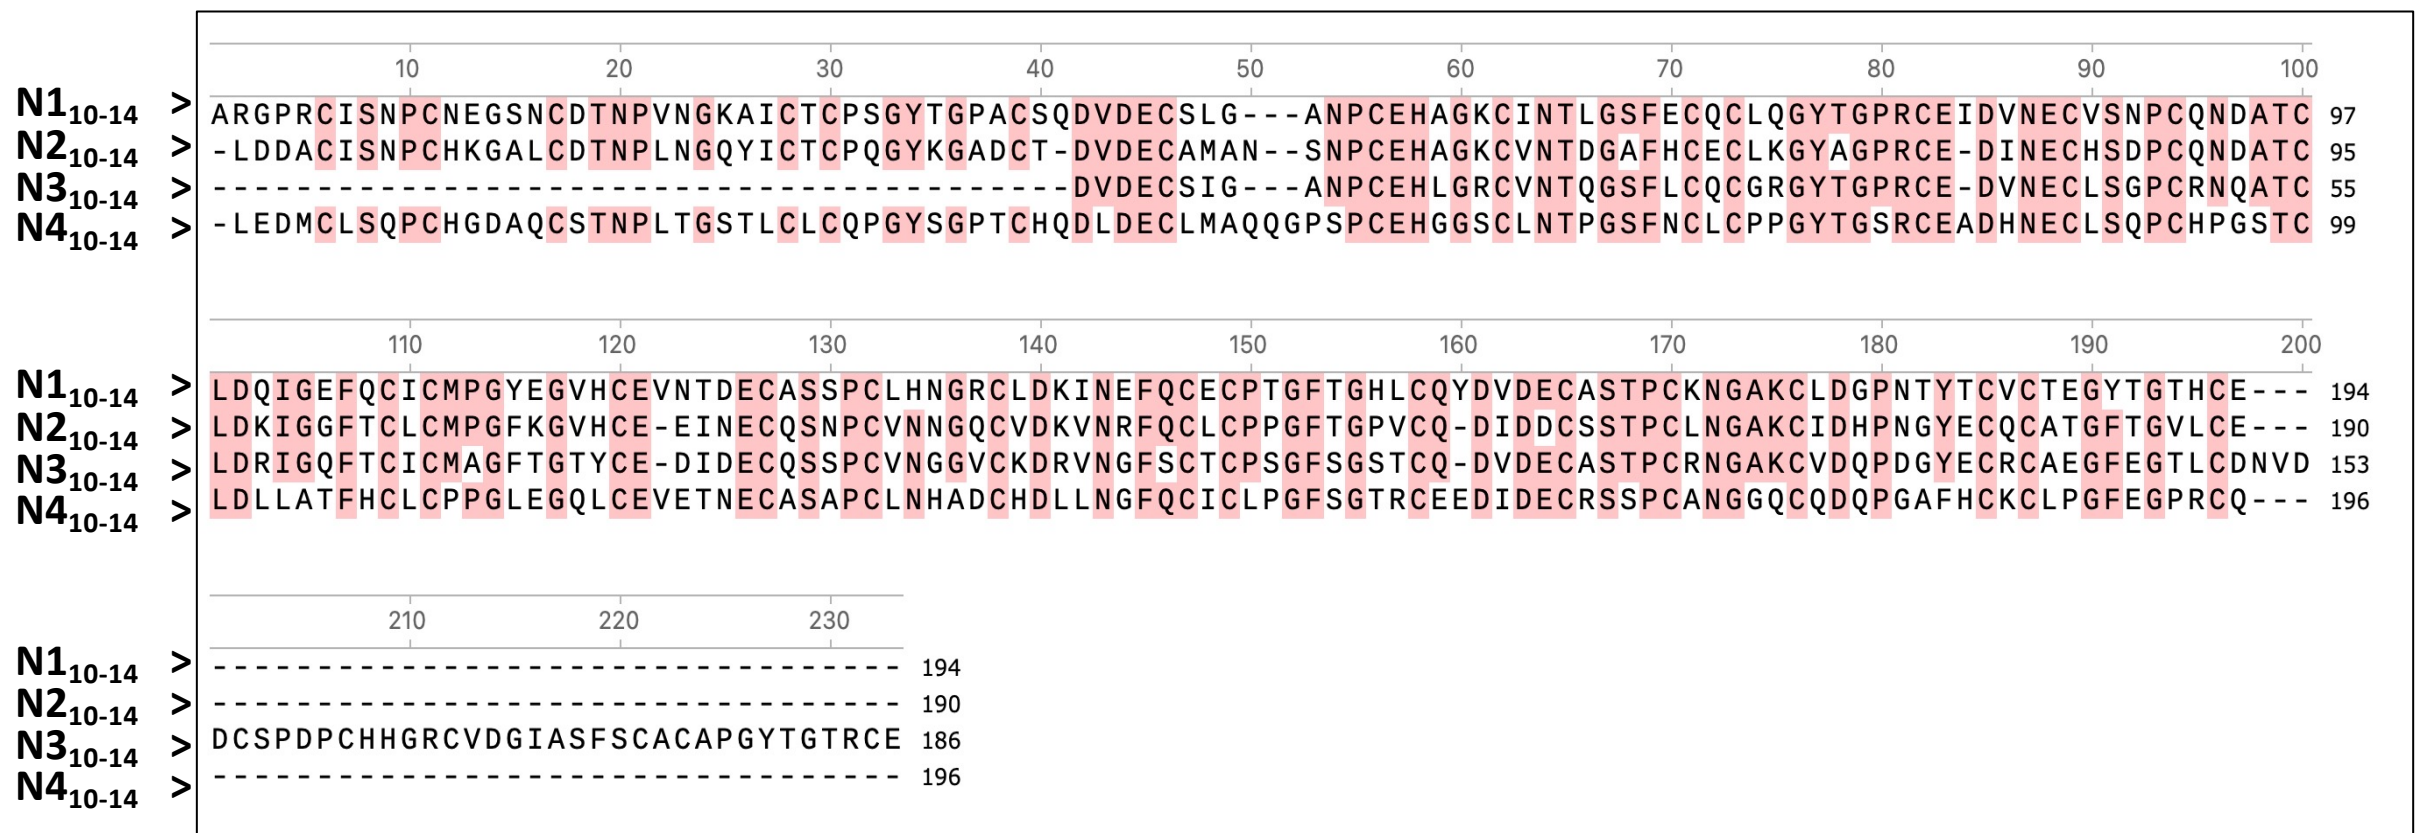**B****Human/mouse Notch core binding domain alignment**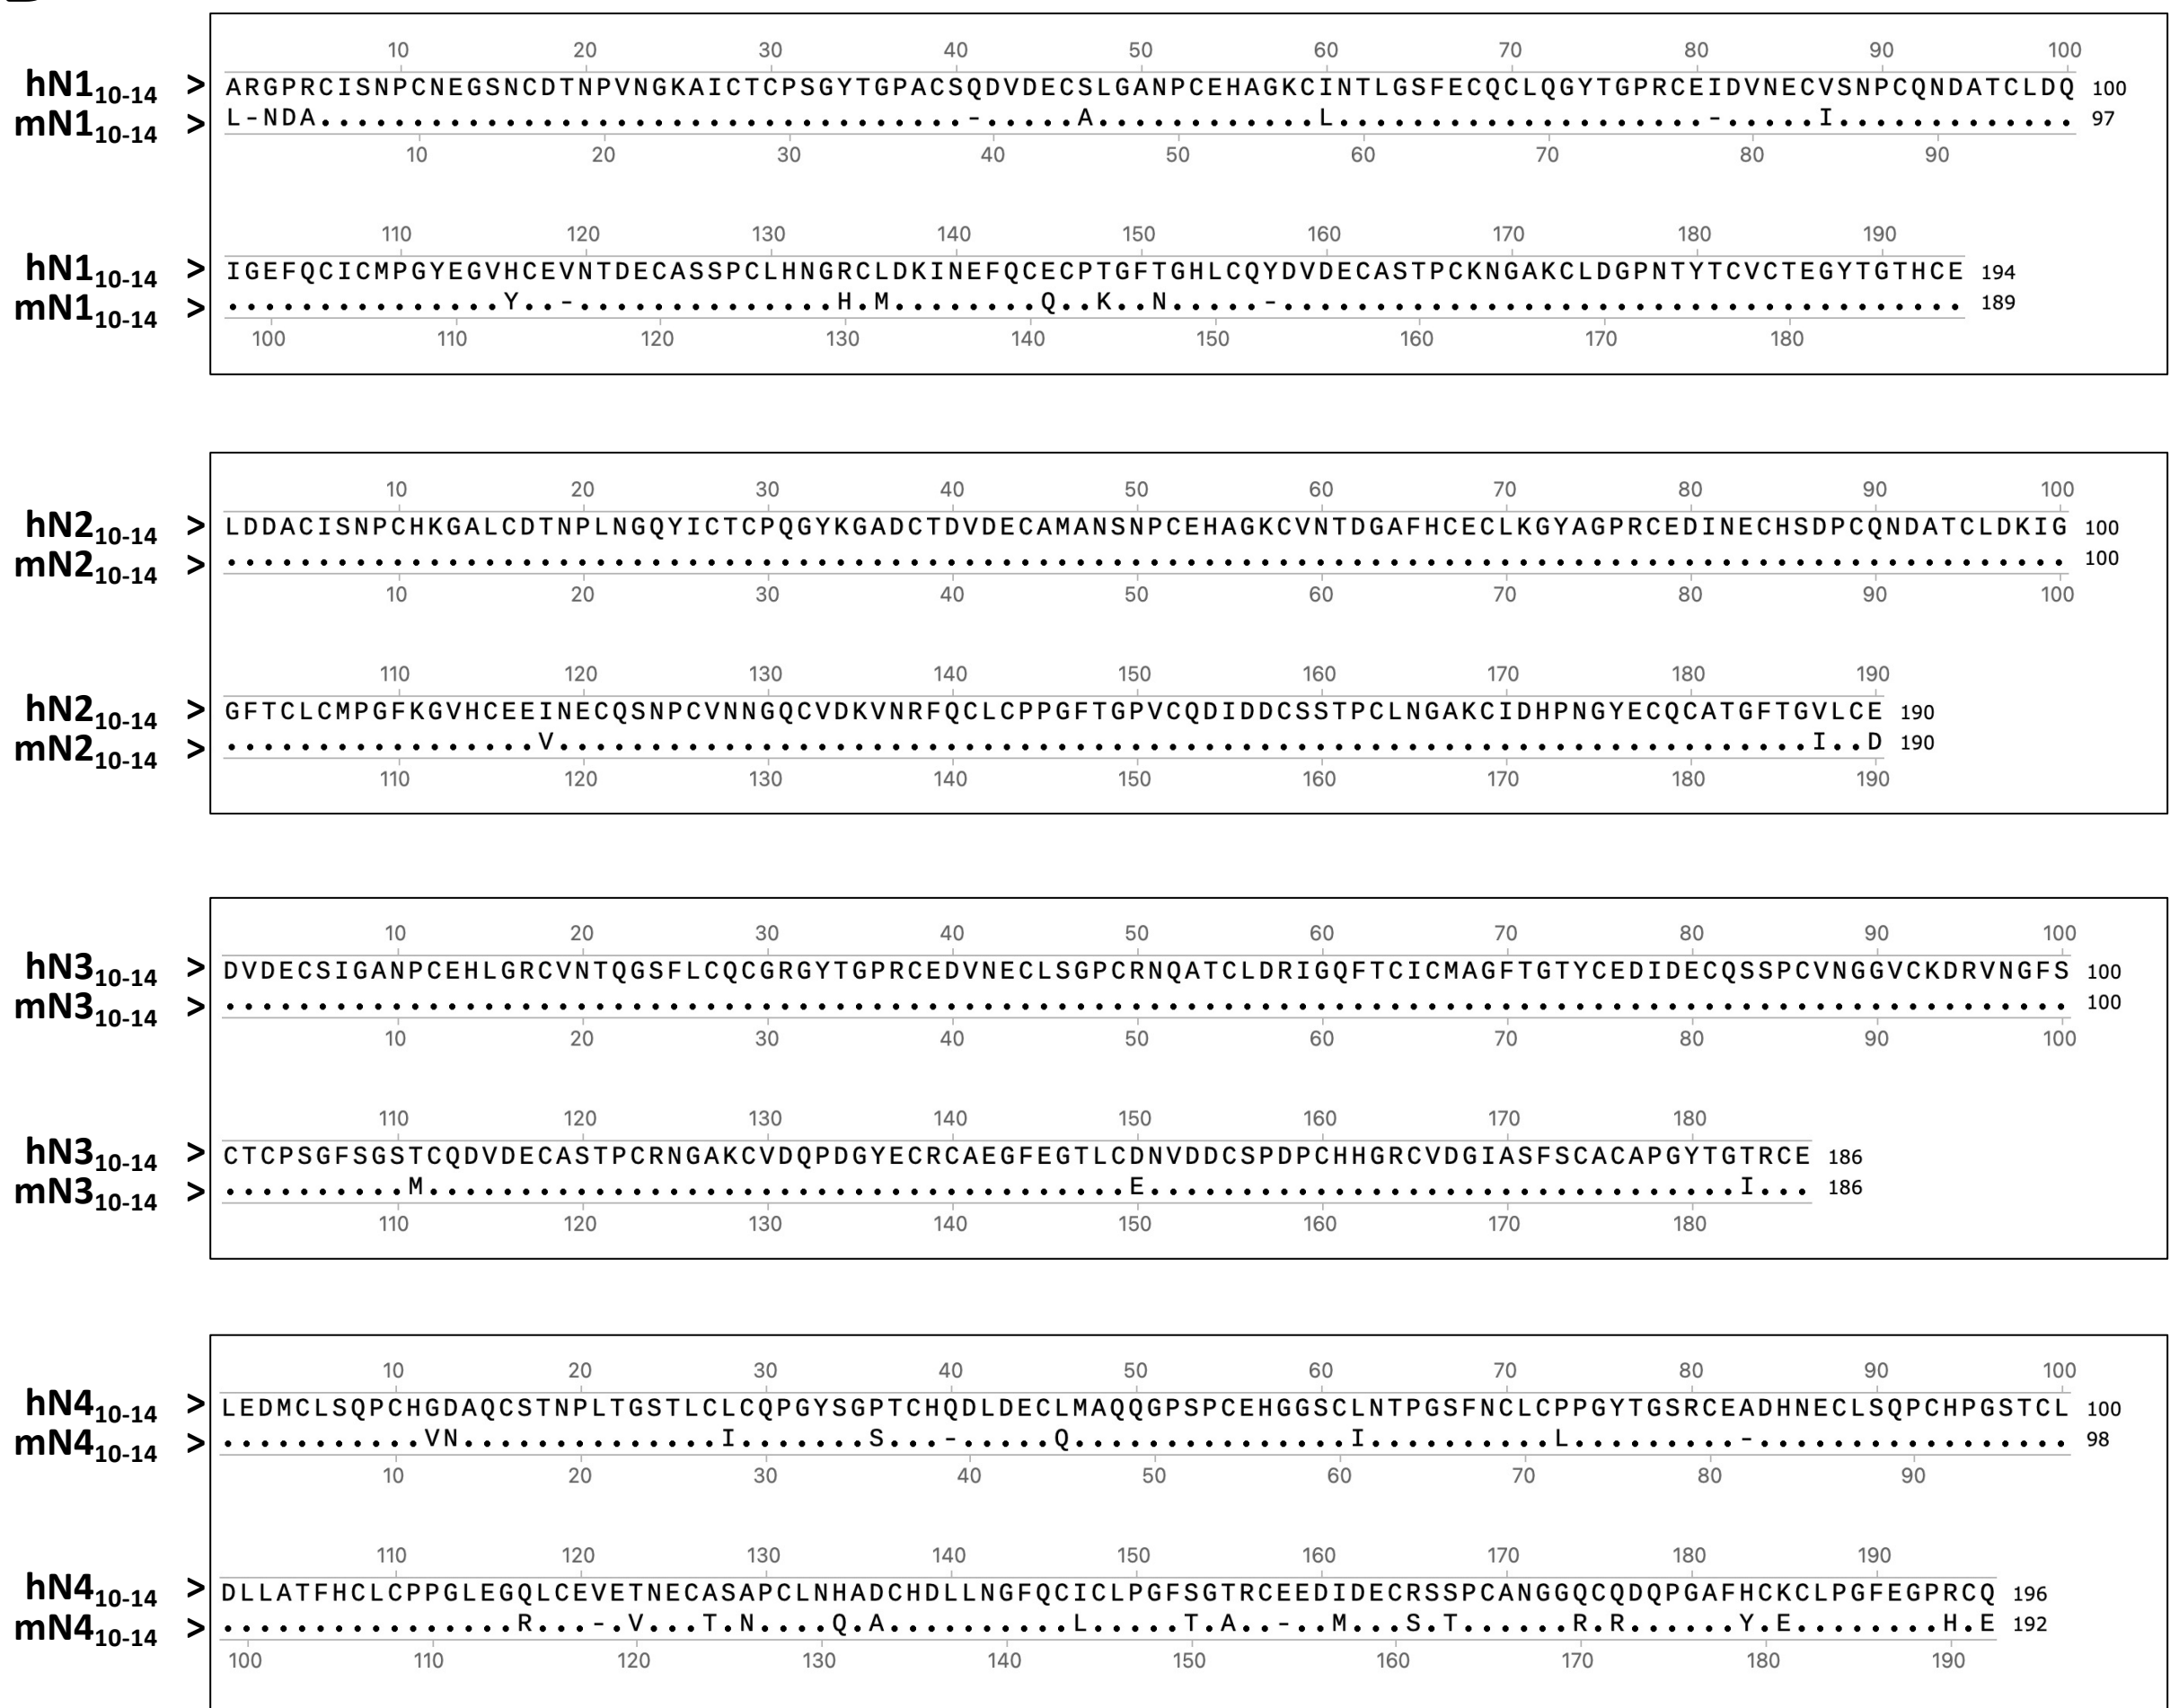

**Figure S1: Comparison of Notch putative core binding domains within and between species. (A) Amino acid alignment of EGFs 10-14 of the four human Notch receptors. Pink highlighting indicates identity, dashes indicate lack of alignment. (B) Amino acid alignment of EGFs 10-14 of each human Notch protein with its murine ortholog. Dots indicate amino acid identity.**

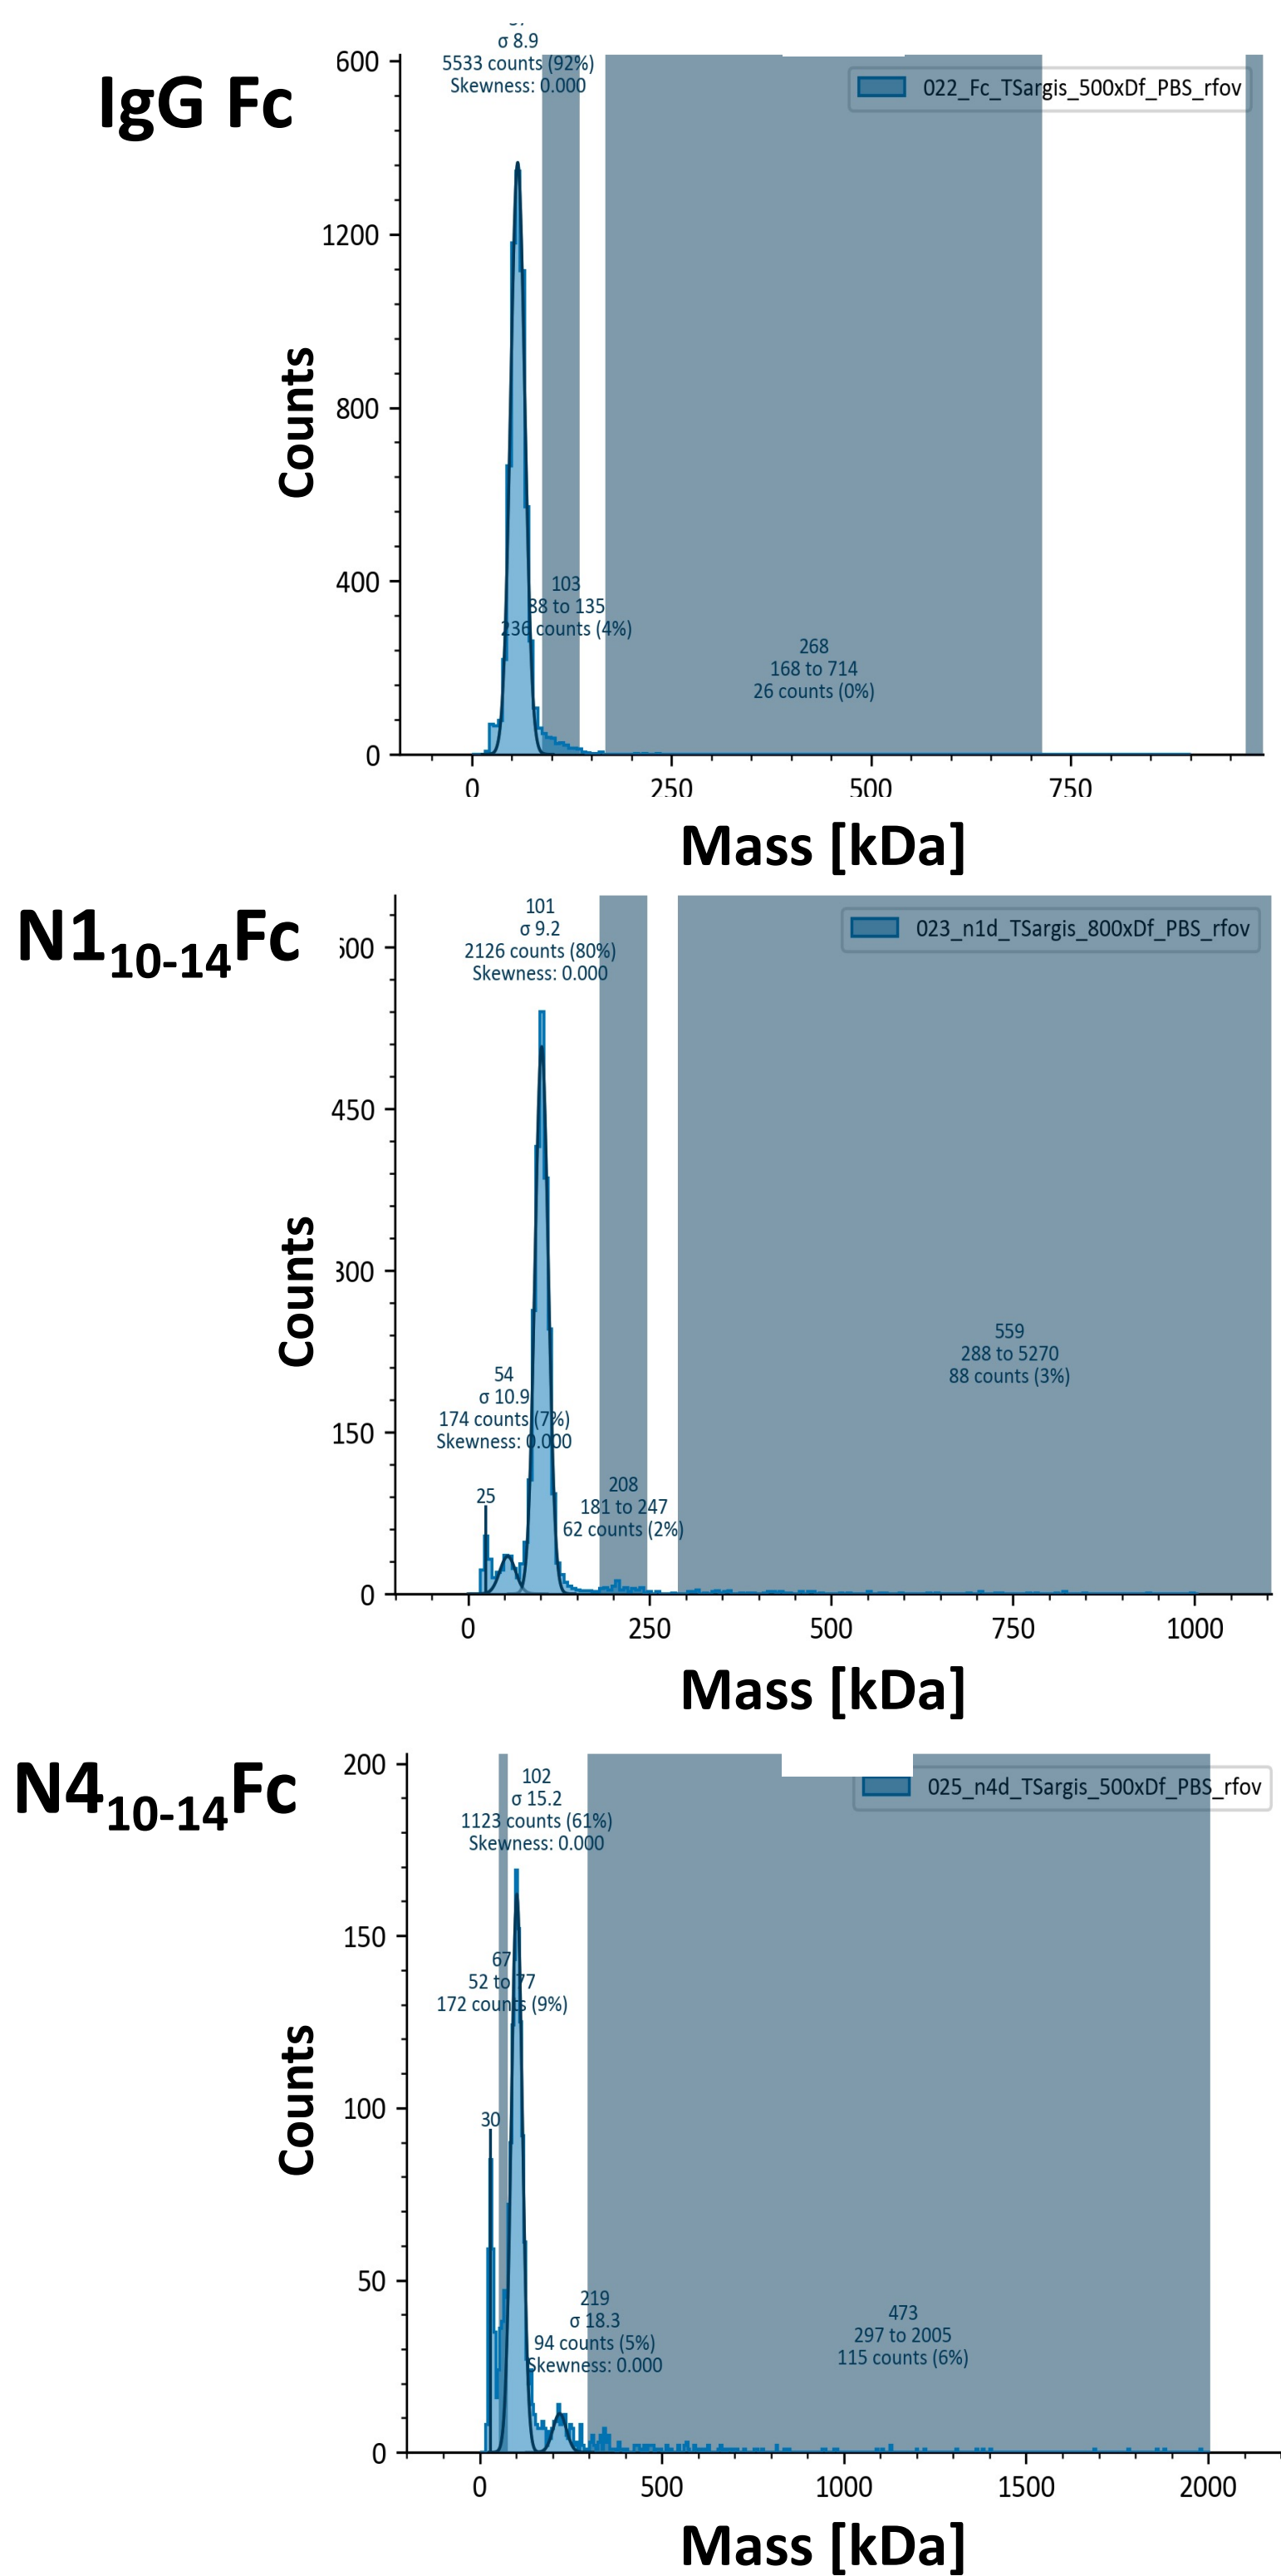

**Figure S2: Mass photometry.** molecular mass distribution of purified IgG Fc, N1<sub>10-14</sub>Fc, and N4<sub>10-14</sub>Fc as measured by mass photometry. Blue shaded regions indicate detectable oligomerization states and their respective percentage of population.

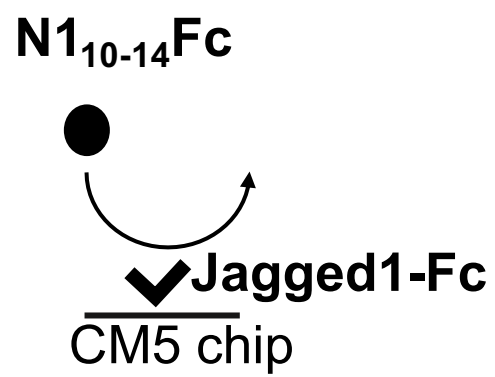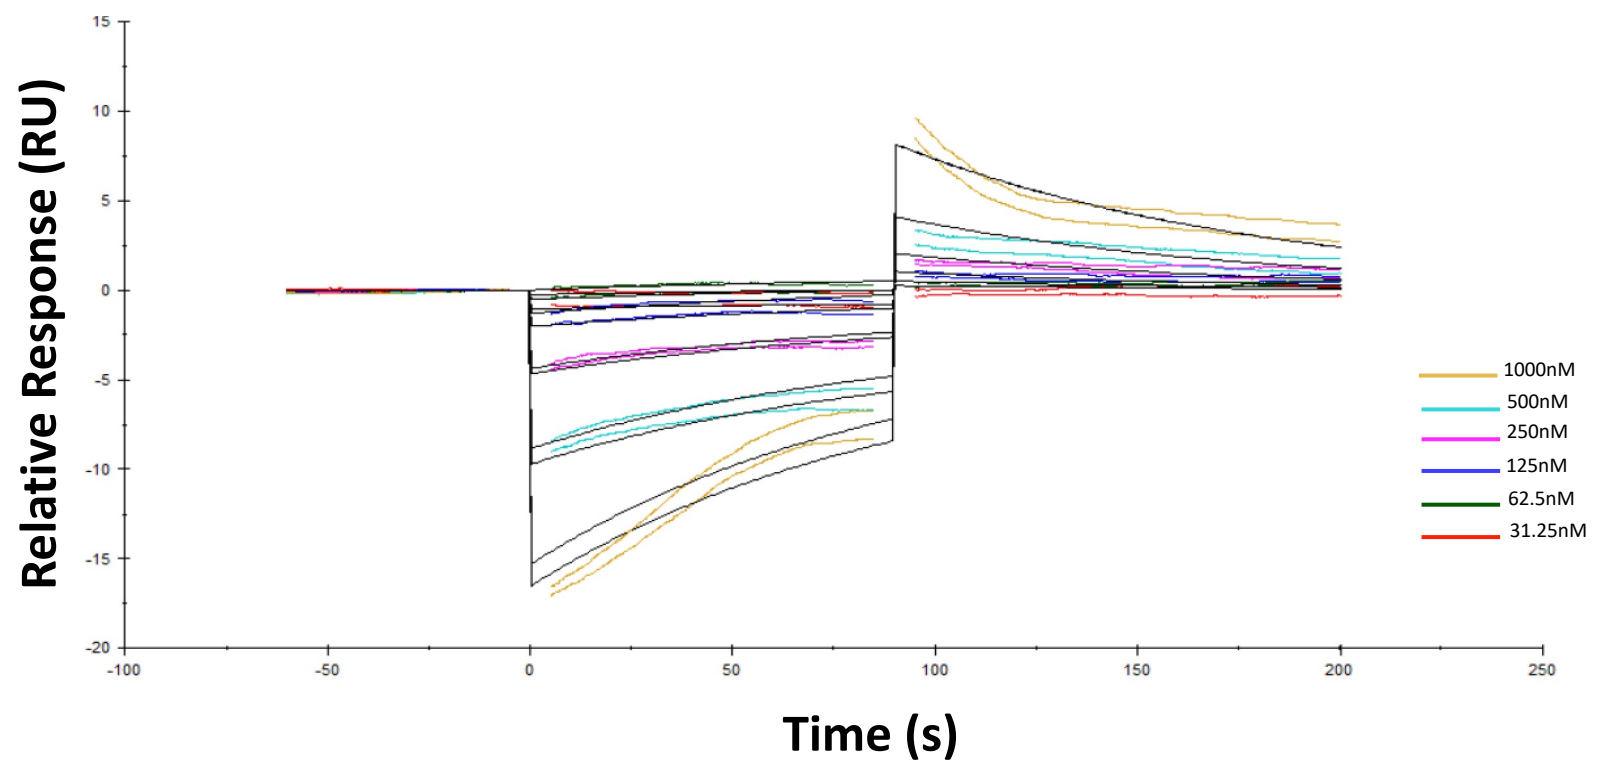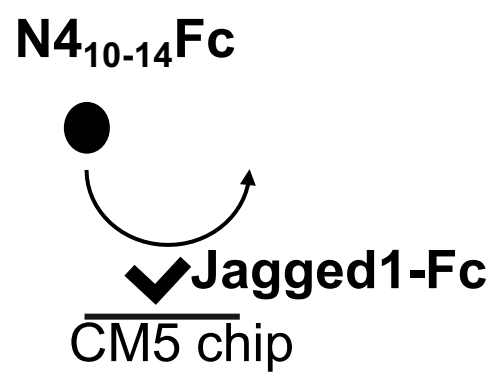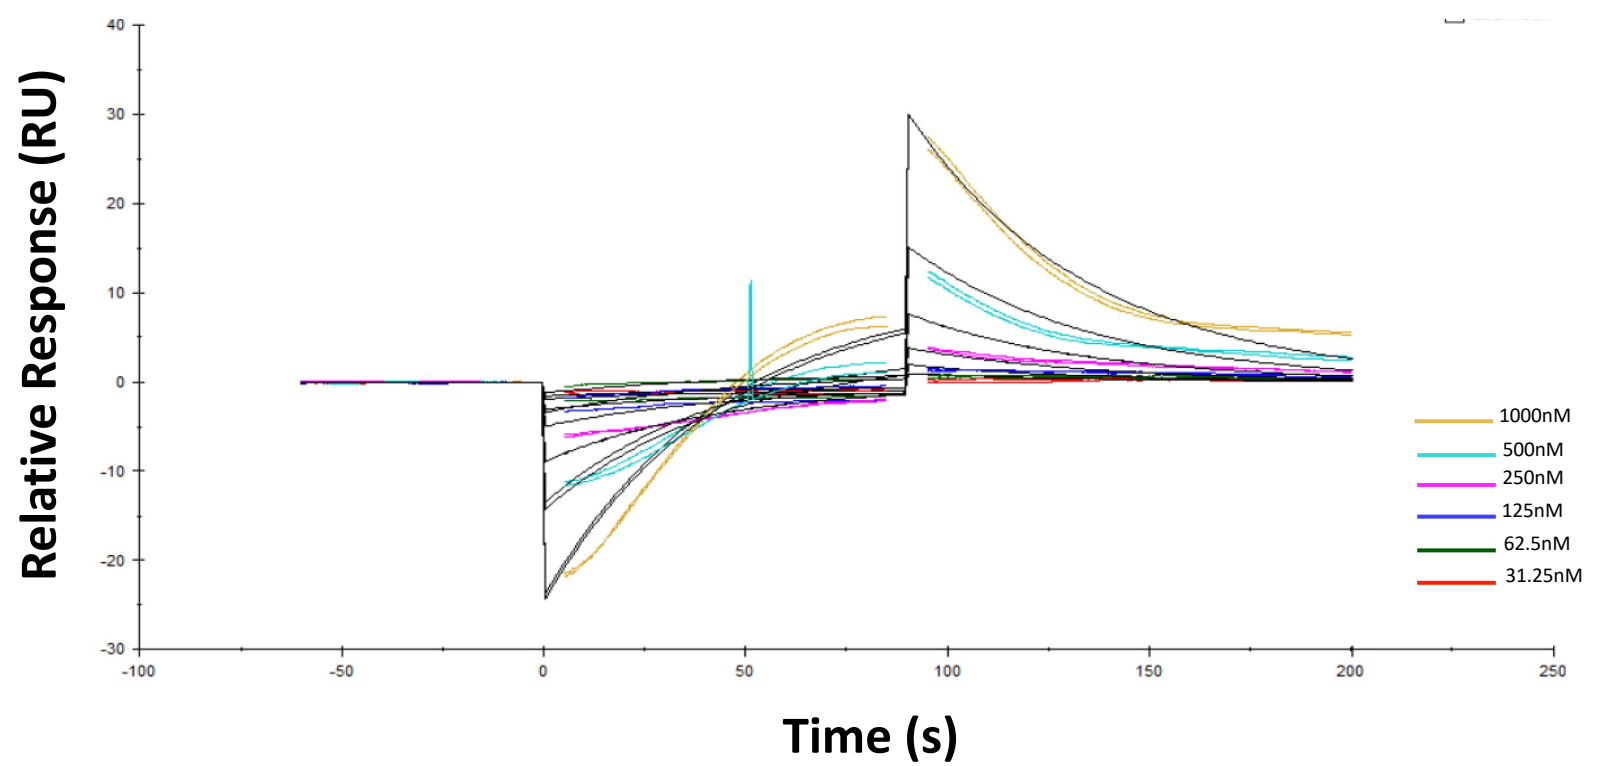

**Figure S3: Binding of hJAG1-Fc to N1<sub>10-14</sub>Fc and N4<sub>10-14</sub>Fc.** SPR measurements show binding affinity of N1<sub>10-14</sub>Fc and N4<sub>10-14</sub>Fc to hJAG1. Recombinant Fc-tagged hJAG1 was immobilized on the sensor chip using amine coupling and multi-cycle kinetic experiments were performed using increasing concentrations of either N1<sub>10-14</sub>Fc or N4<sub>10-14</sub>Fc. Binding was insufficient to allow for reliable calculation of K<sub>d</sub> values.

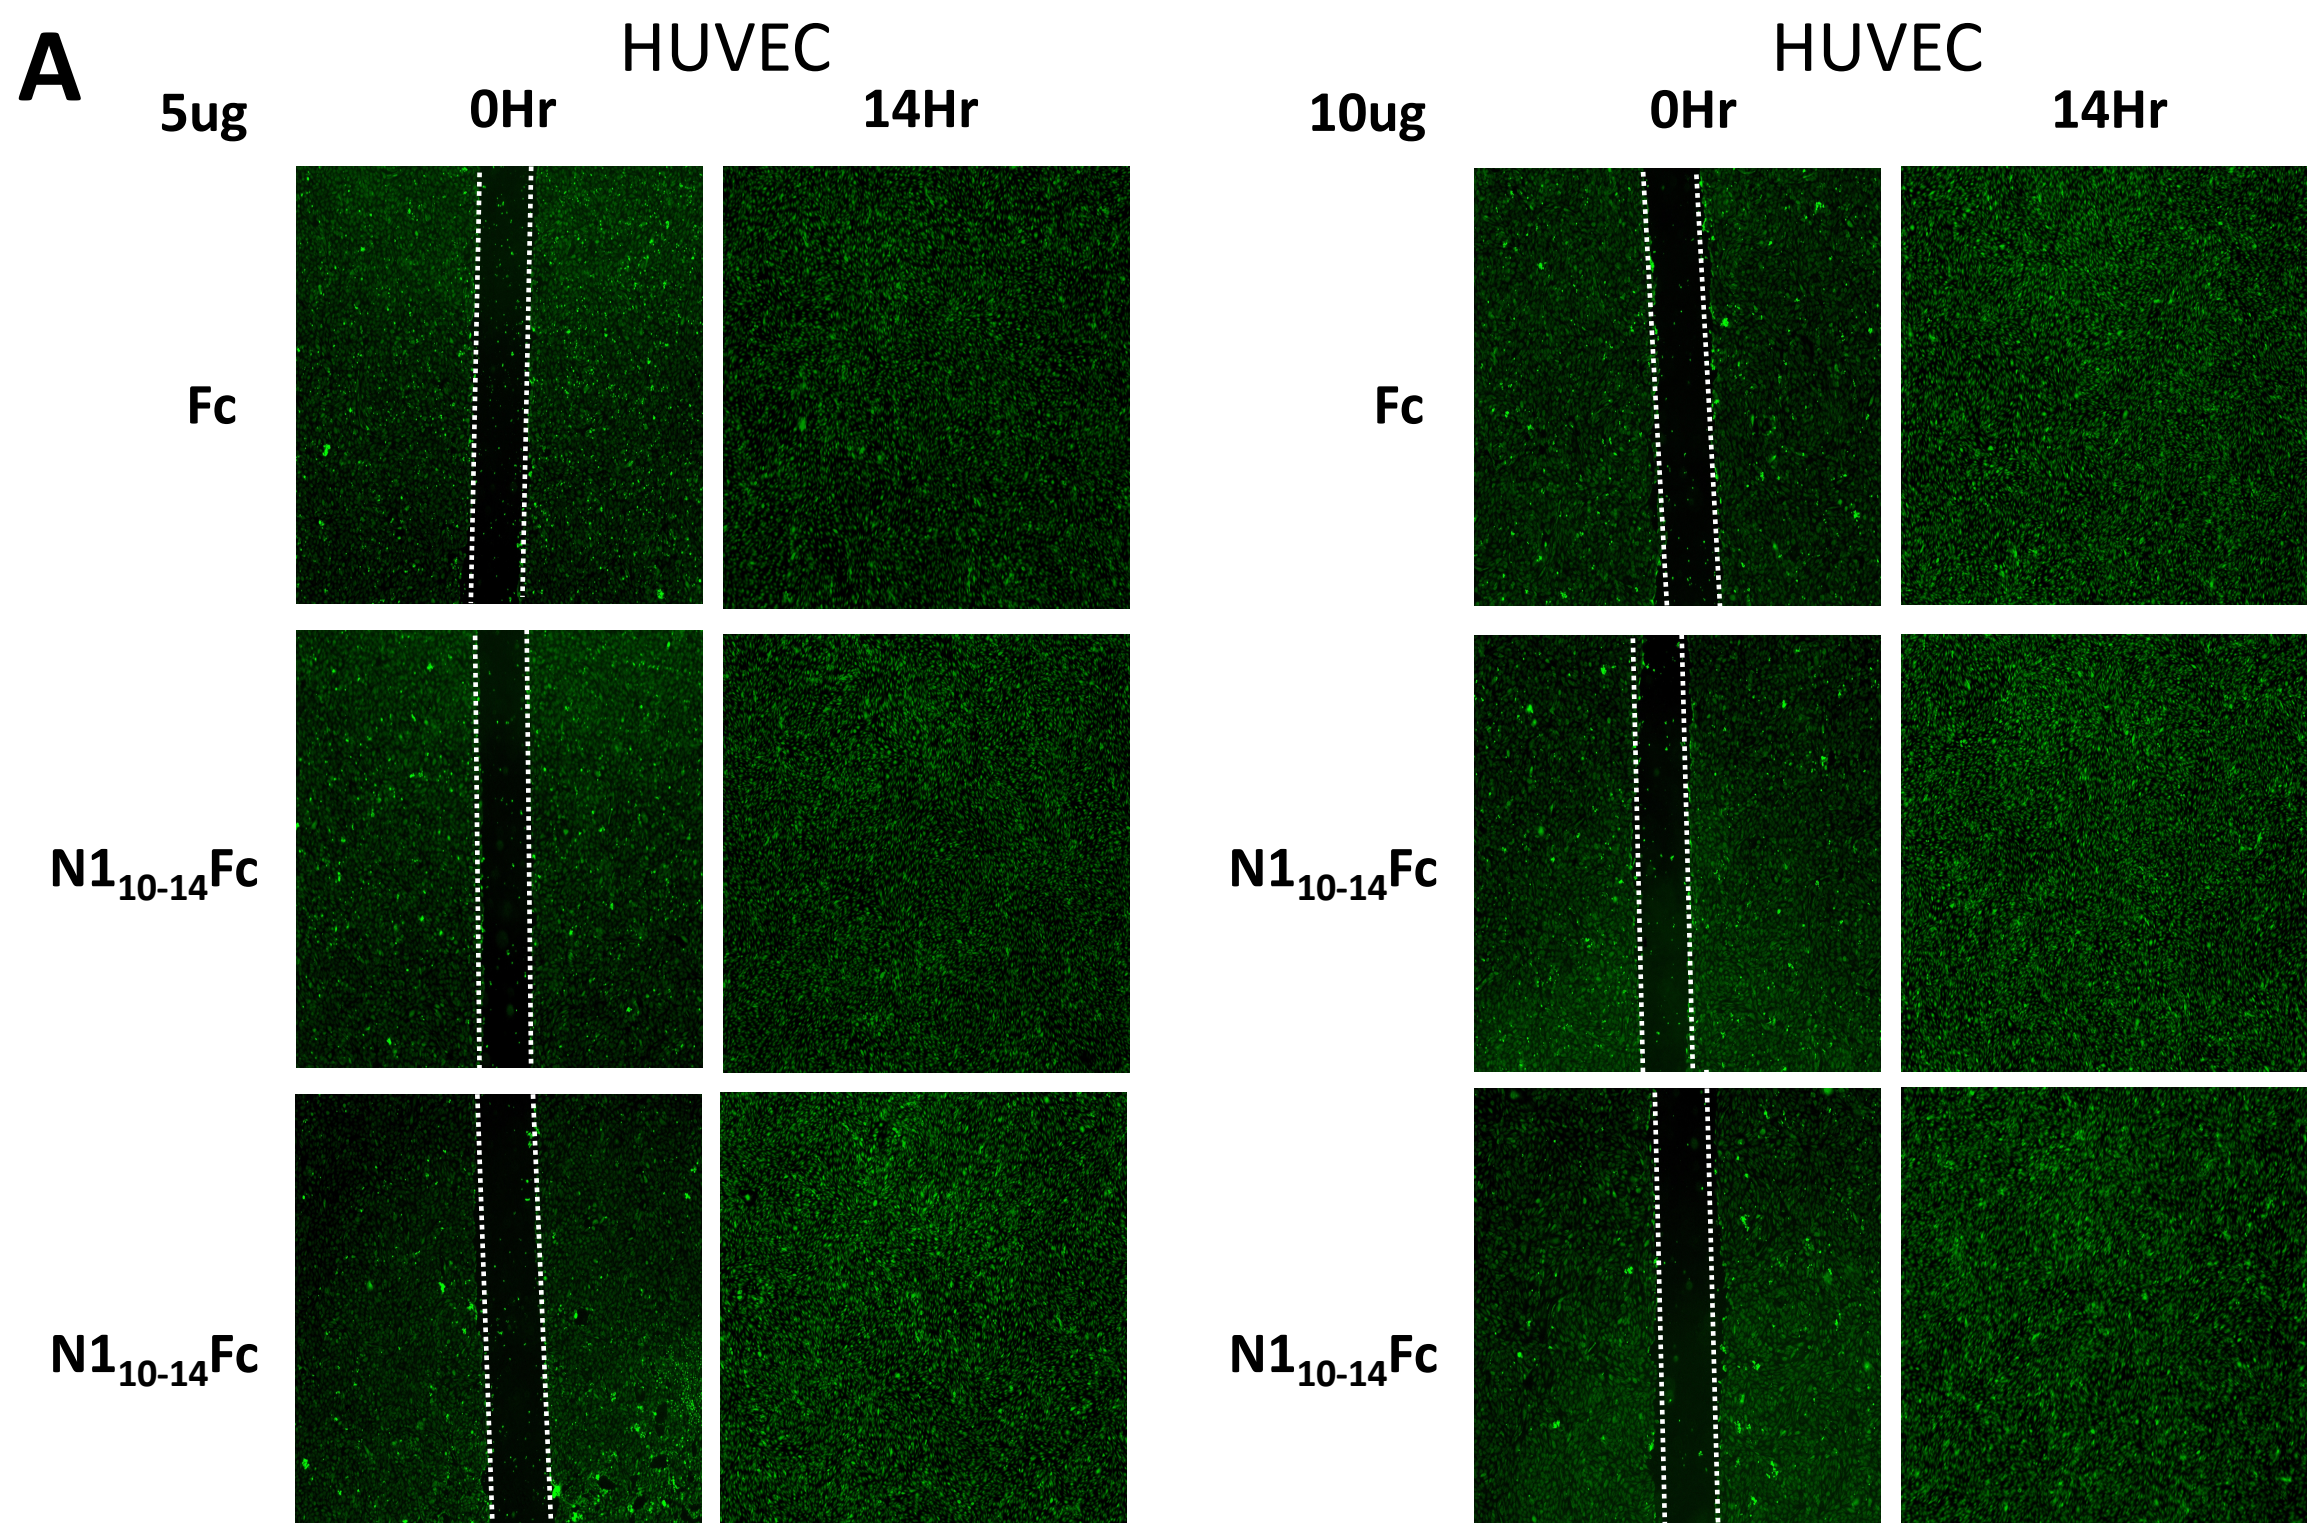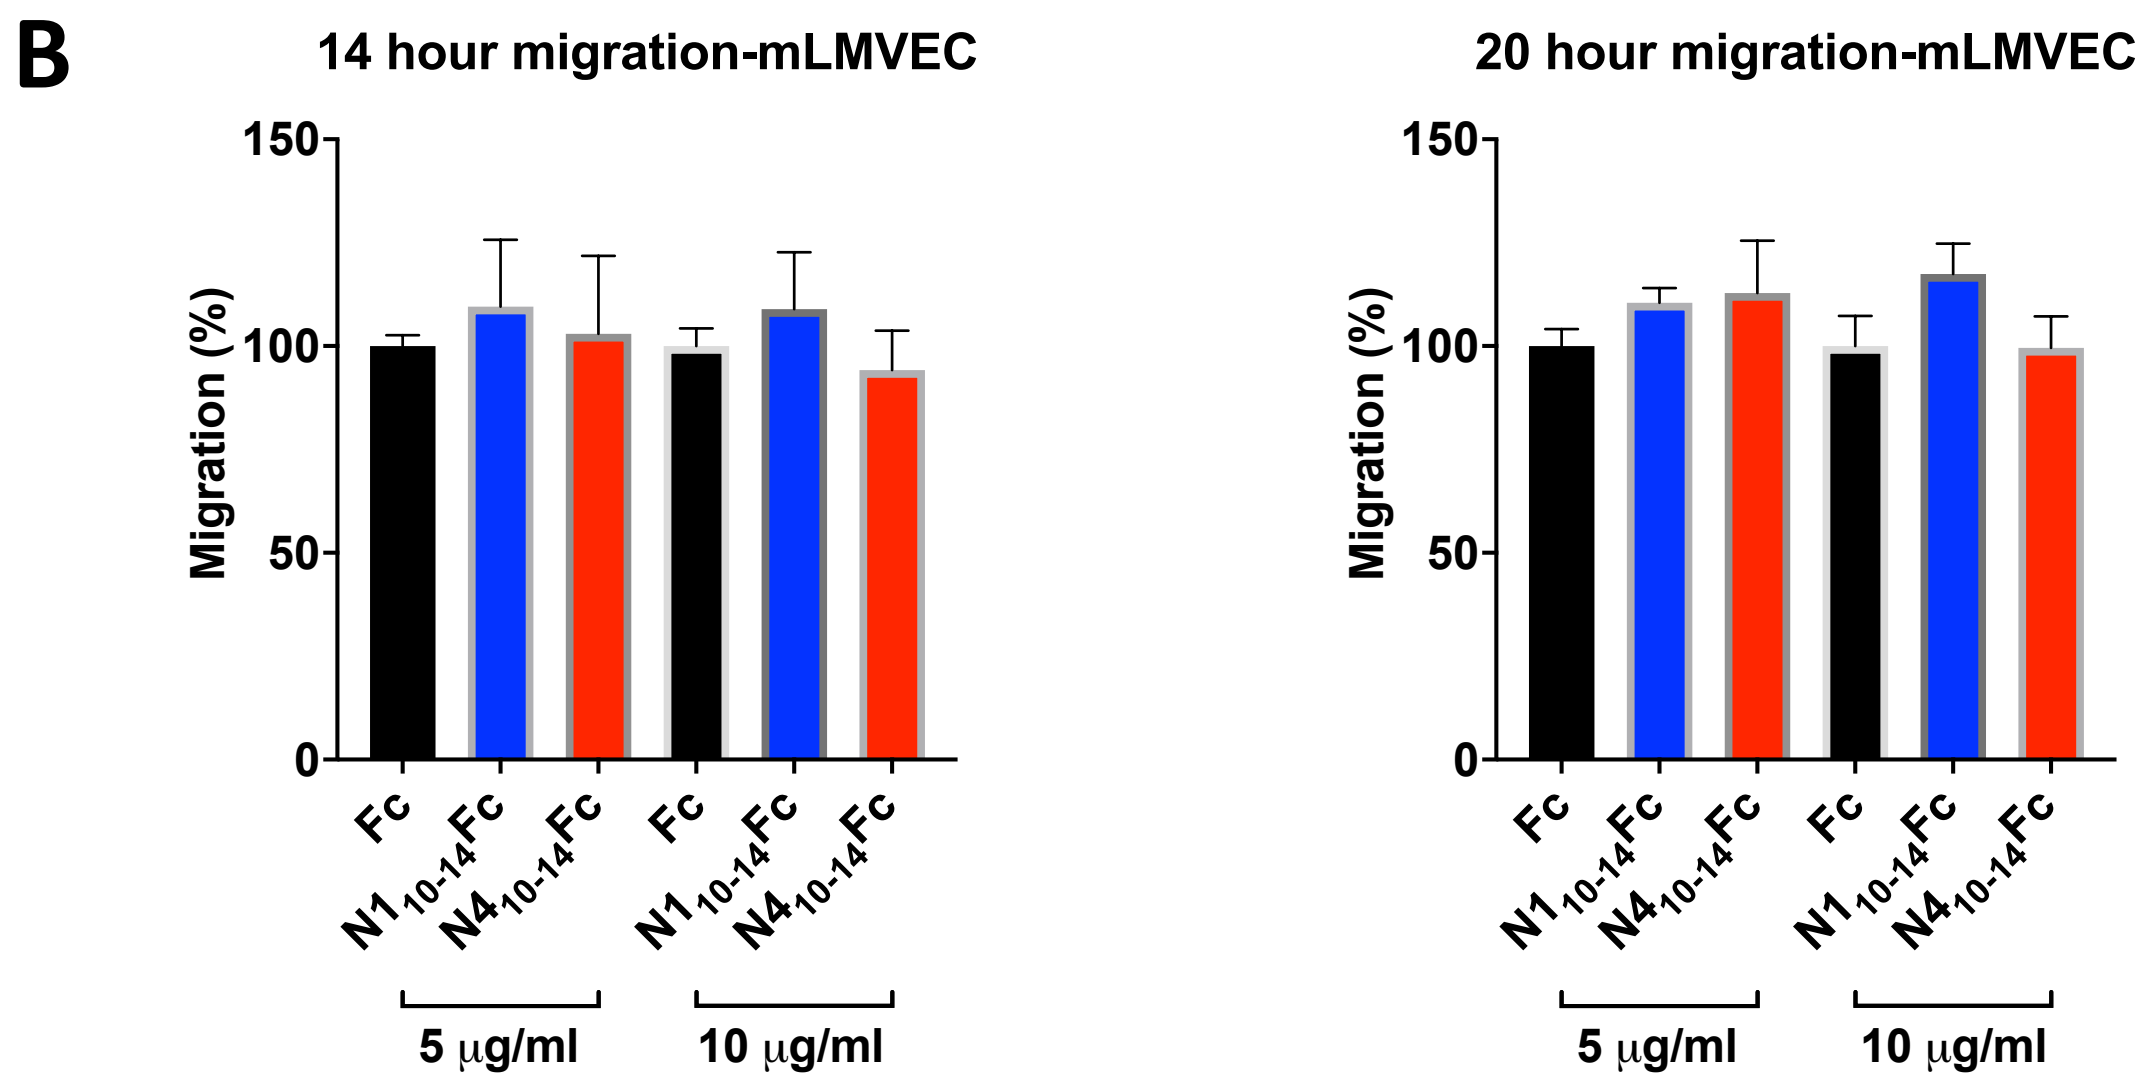

**Figure S4: Wound healing assay of endothelial cells treated with Notch peptibodies.** (A) HUVEC treated with cell-tracker CMFDA dye were seeded in 24-well plates and “scratch-wounded” using a 200  $\mu$ l pipette tip. After wounding, cells were treated with different concentrations (5 or 10  $\mu$ g/ $\mu$ l) of either IgG Fc, N1<sub>10-14</sub>Fc or N4<sub>10-14</sub>Fc. After 14 hours, microscopy was used to image cell migration into the scratch region. (B) Quantitation of identical experiments performed with mouse endothelial cells (mLMVEC) and assessed at 14 and 20 hours.

**A****KopTK**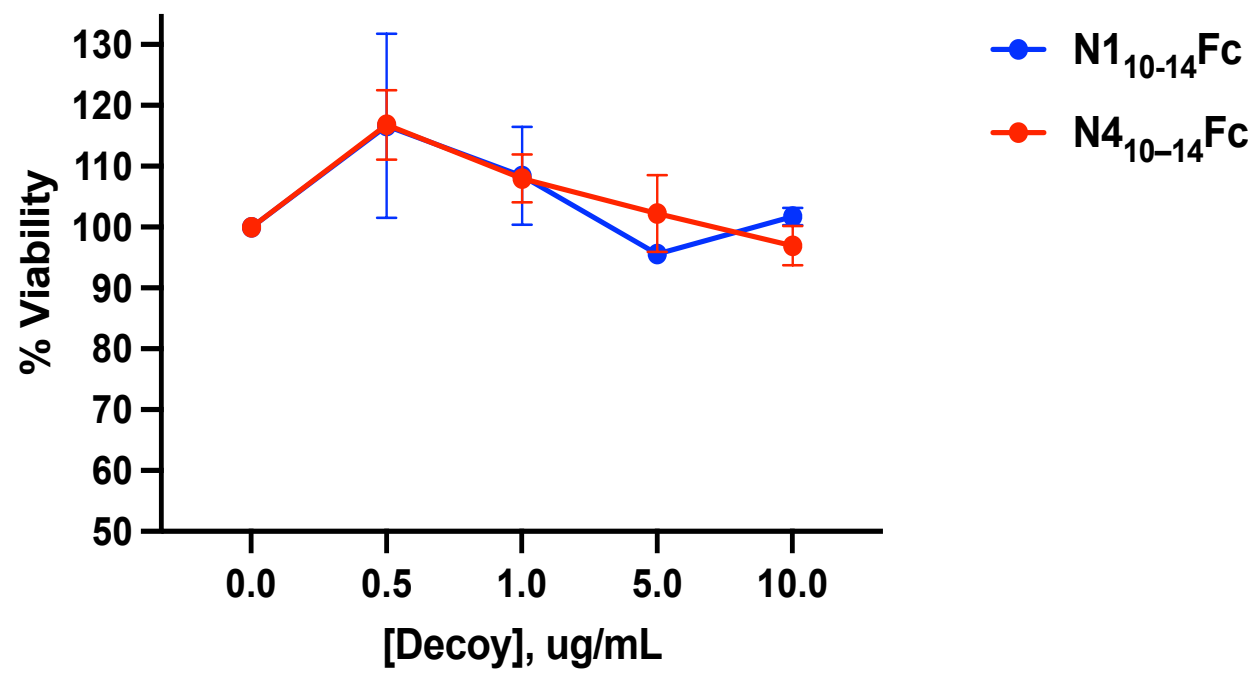**B****T6E**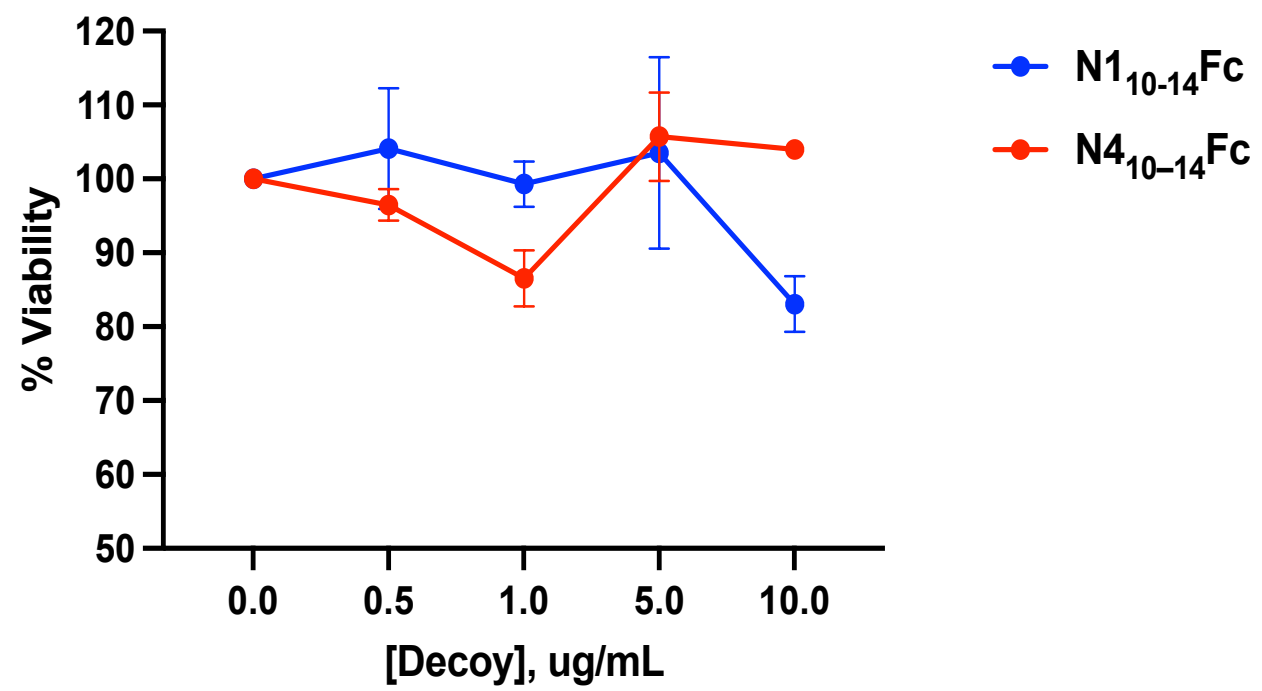

**Figure S5: Viability assay of human and mouse T cell acute lymphoblastic leukemia (T-ALL) treated with Notch peptibodies.** (A) human KopTK and (B) mouse T6E T-ALL cells were seeded at  $8 \times 10^3$  cells per well in a 96-well plate in RPMI media and treated with the indicated concentration of IgG Fc, N1<sub>10-14</sub>Fc or N4<sub>10-14</sub>Fc for 72 hours. Viability in peptibody treated cells was assessed as the percent viable cells relative to the IgG Fc treated control group. Error bars indicate standard error of mean. For T-ALL experiments, n=3 for panel A and n=2 for panel B, no differences were significant.

IgG Fc (12.5 mg/kg)

N1<sub>10-14</sub>Fc (12.5 mg/kg)

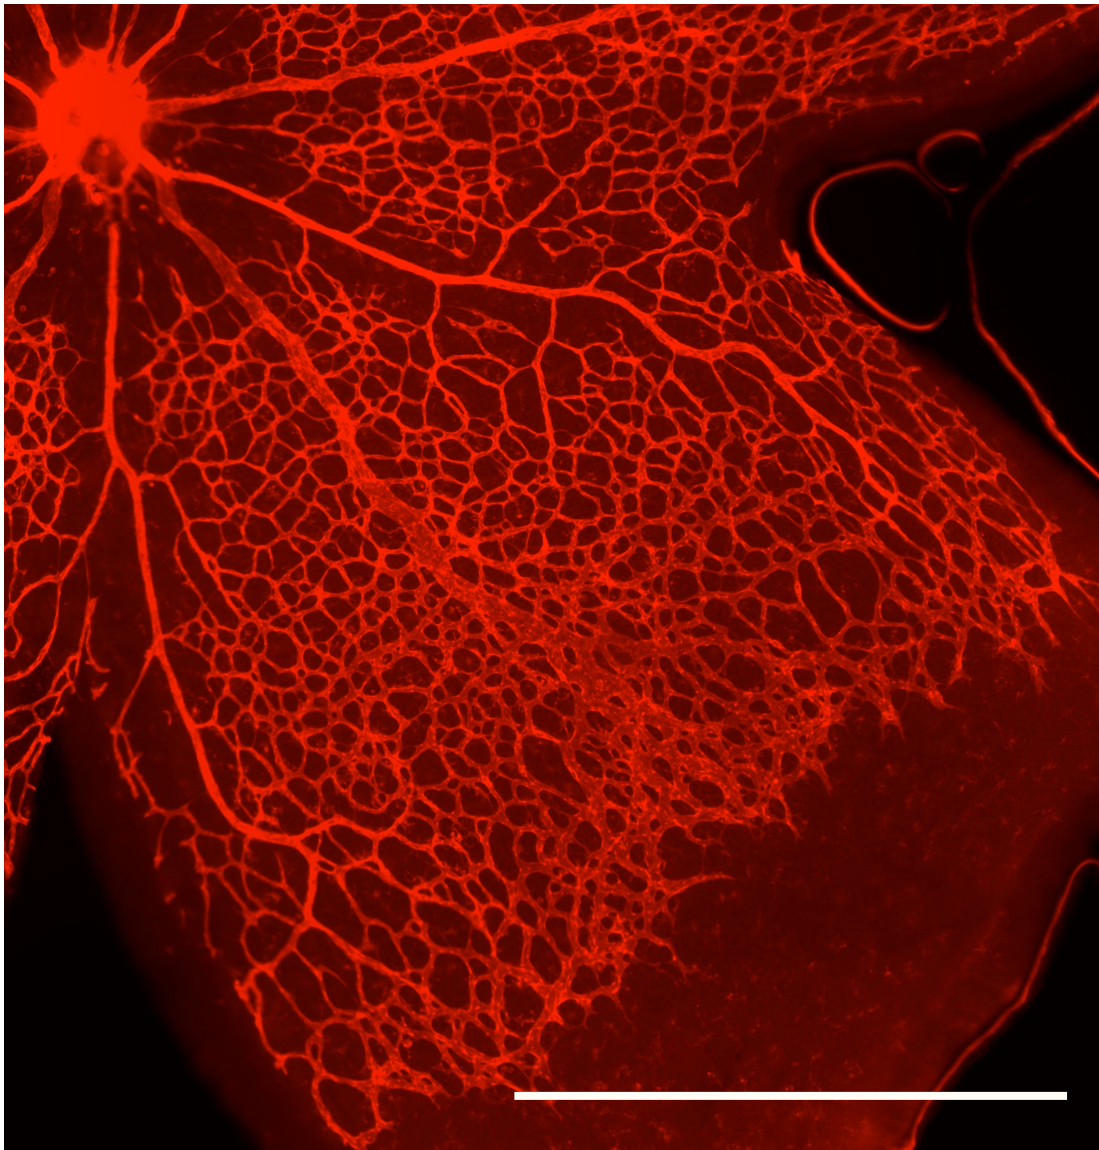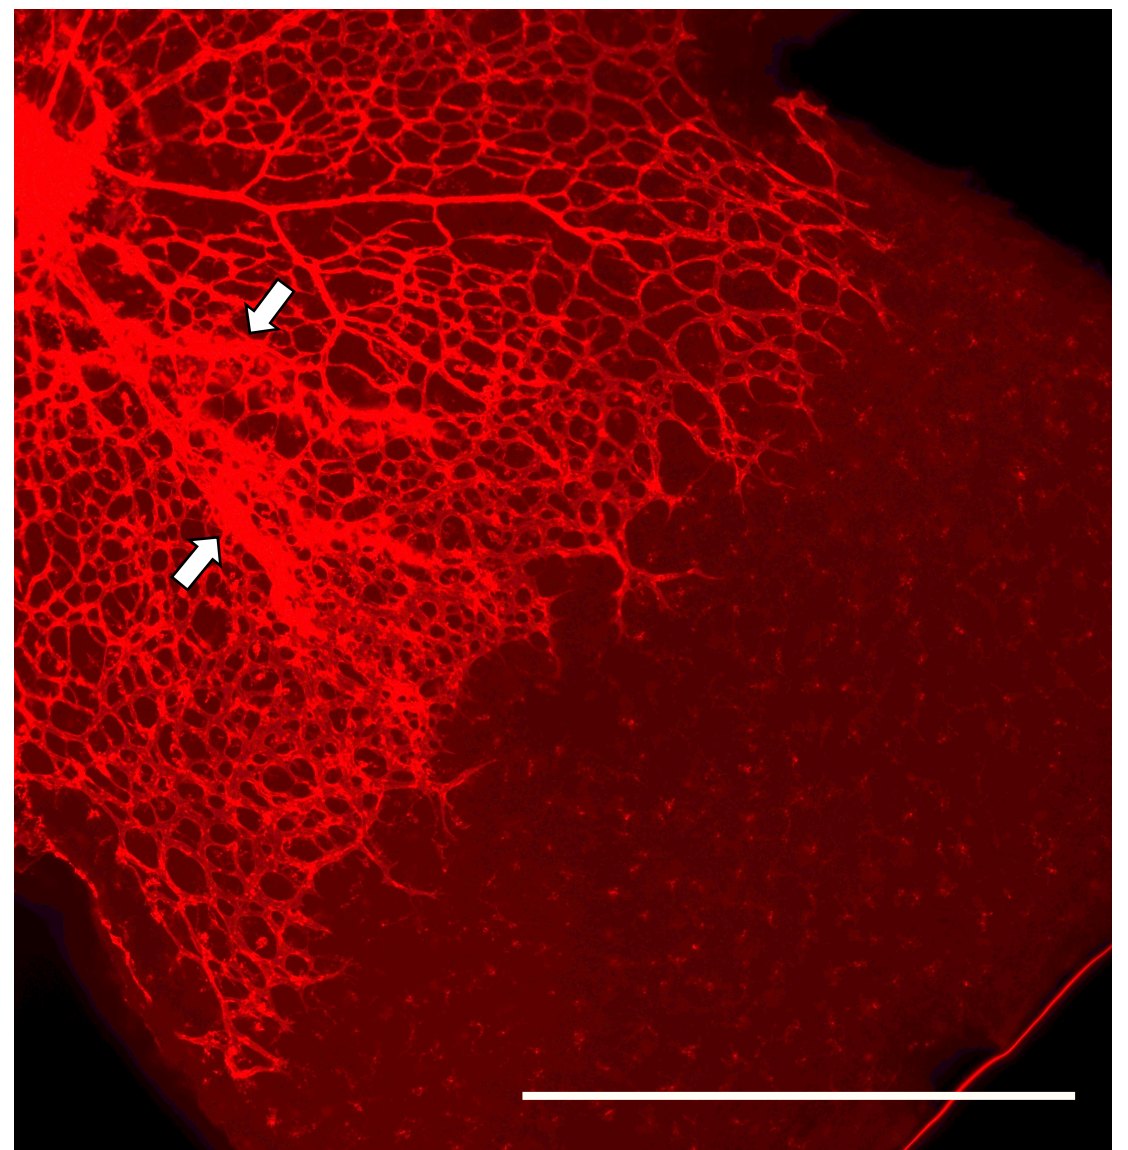

**Figure S6: N1<sub>10-14</sub>Fc induces abnormal enlargement of veins *in vivo*.** C57BL/6 mice were injected intragastrically with 12.5 mg/kg of recombinant N1<sub>10-14</sub>Fc decoy or IgG Fc for three days postnatally (P1-P3). (A) Representative images showing post-natal day 5 (P5) retinal vasculature stained with Isolectin B4 (red). (A) Arrowed region highlights enlarged veins. Scale bars: 1000  $\mu$ m.

**TABLE 1: QPCR PRIMERS**

| Species | Gene   | Forward Sequence (5'-3') | Reverse Sequence (5'-3')  |
|---------|--------|--------------------------|---------------------------|
| Human   | ACTB   | CGAGGCCAGAGCAAGAGAG      | CTCGTAGATGGGCACAGTGTG     |
| Human   | HEY1   | ATCTGCTAAGCTAGAAAAAGCCG  | GTGCGCGTCAAAGTAACCT       |
| Human   | HEY2   | GCCCCCCTTGTCAGTATC       | CCAGGGTCGGTAAGGTTTATTG    |
| Human   | HES1   | CCTGTCATCCCCGTCTACAC     | CACATGGAGTCGCGGTAA        |
| Human   | NRARP  | TCAACGTGAACTCGTTCGGG     | ACTTCGCCTGGTGATGAGAT      |
| Human   | RND1   | CTATCCAGAGACCTATGTGCC    | CGGACATTATCGTAGTAGGGAG    |
| Human   | CCL2   | AGGTGACTGGGGCATTGAT      | GCCTCCAGCATGAAAGTCTC      |
| Human   | CCL8   | TTCTGTGCCTGCTGCTCATG     | TTGGATGTTGGTGATTCTTGTGTAG |
| Human   | NOTCH1 | GTCATCTCCGACTTCATCTACC   | CGGAATCAGAGCGTGAGTAG      |
| Human   | NOTCH4 | AGATAAATGGGGGAAAAGTGGCG  | CCTGGGCATCTTTATCGGCT      |

**Table S1: Primers used in RT-qPCR.** Table of sequences of qPCR primers.
